# Supplementary material
Source: publisher figshare collection journal article supplement (https://frontiersin.figshare.com/ndownloader/files/18024110)

**Supplementary Figure 3.** Cluster analysis of samples using UPGMA method. Ammonia and acetic acid concentrations gave good correlations with the clusters

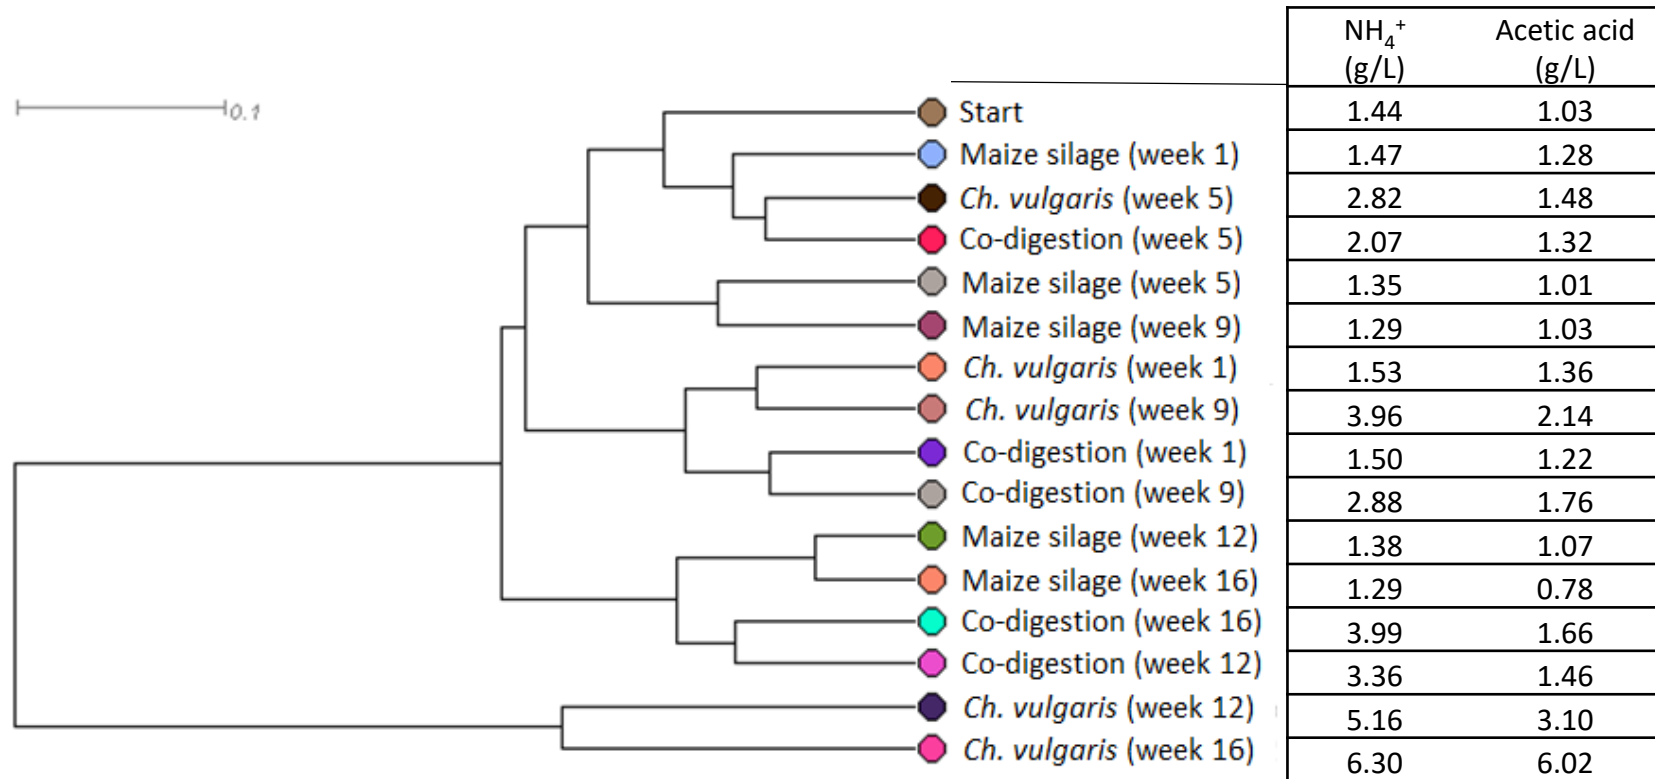

Supplement: Supplementary file 1 [file 18024110]
